# Supplementary material for: Calcofluor white-cholesteryl hydrogen succinate conjugate mediated liposomes for enhanced targeted delivery of voriconazole intoCandida albicans
Source: Royal Society of Chemistry journal article supplement (doi:10.1039/d2bm01263d), 2022-11-30
Supplement: d2bm01263d1.pdf [file d2bm01263d1.pdf]

Table S1. Stability of CFW-CHSc-VRC-liposomes dispersed at 4 °C (n = 3)

| Storage time (day) | Mean diameter (nm) | Zeta potential (mV) | EE (%)       | DL (%)       |
|--------------------|--------------------|---------------------|--------------|--------------|
| 0                  | 91.38 ± 1.07       | -9.03 ± 1.7         | 44.82 ± 0.57 | 5.33 ± 0.033 |
| 1                  | 92.09 ± 0.79       | -9.21 ± 1.3         | 45.70 ± 0.78 | 5.48 ± 0.068 |
| 14                 | 94.69 ± 0.44       | -9.19 ± 0.9         | 45.31 ± 0.68 | 5.37 ± 0.072 |

Stability of VRC-liposomes dispersed at 4 °C (n = 3)

| Storage time (day) | Mean diameter (nm) | Zeta potential (mV) | EE (%)       | DL (%)       |
|--------------------|--------------------|---------------------|--------------|--------------|
| 0                  | 74.76 ± 1.05       | -16.9 ± 0.85        | 53.02 ± 0.84 | 6.11 ± 0.052 |
| 1                  | 74.89 ± 0.75       | -16.3 ± 1.16        | 52.67 ± 0.61 | 6.15 ± 0.091 |
| 14                 | 75.91 ± 1.38       | -16.7 ± 0.48        | 53.26 ± 0.66 | 6.23 ± 0.037 |

Note: All data expressed as means ± standard deviations.

Abbreviations: VRC Voriconazole; EE Entrapment efficiency; DL Drug loading capacity

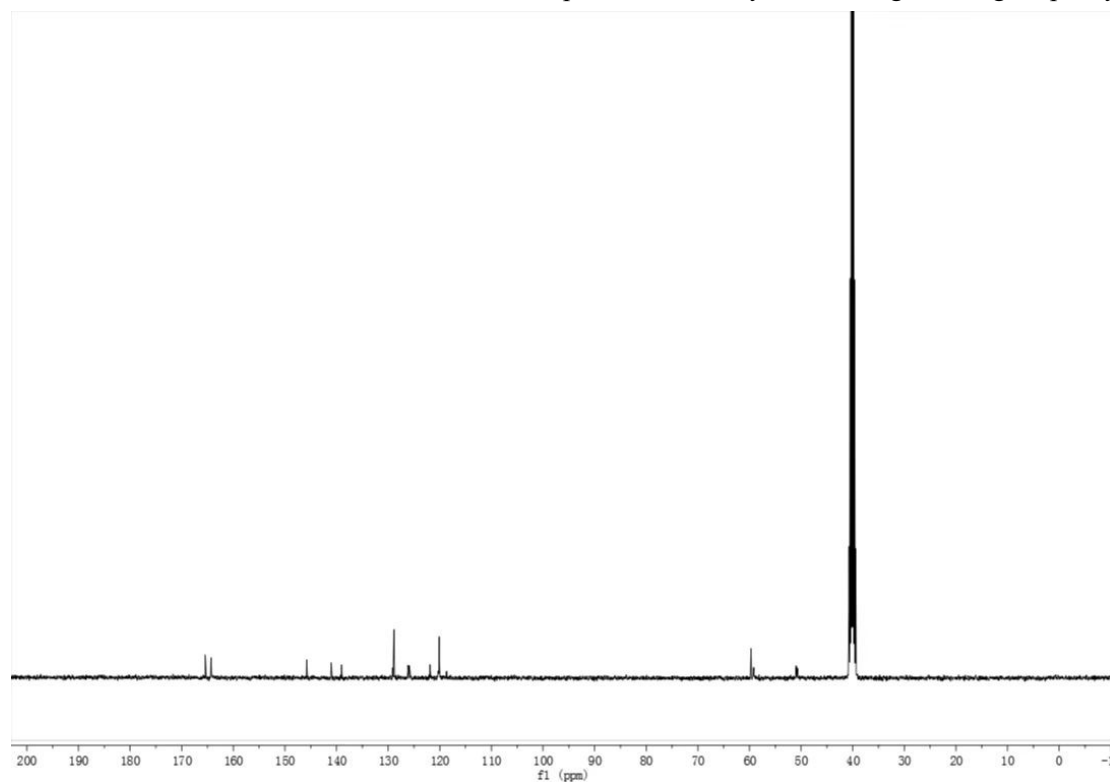

Figure S1. <sup>13</sup>C NMR spectrum of CFW in DMSO.
